# Supplementary material for: Assessing Adherence, Competence and Differentiation in a Stepped-Wedge Randomised Clinical Trial of a Complex Behaviour Change Intervention
Source: MDPI journal article supplement (doi:10.3390/nu12082332), 2020-08-04
Supplement: s1 [file s1]

|                               | Wave 1  | Wave 2       | Wave 3       | Wave 4       | Wave 5       |
|-------------------------------|---------|--------------|--------------|--------------|--------------|
| Hospital 1                    | Control | Intervention | Intervention | Intervention | Intervention |
| Hospital 2                    | Control | Control      | Intervention | Intervention | Intervention |
| Hospital 3                    | Control | Control      | Control      | Intervention | Intervention |
| Hospital 4 and 5 <sup>a</sup> | Control | Control      | Control      | Control      | Intervention |

<sup>a</sup> Training occurred at the same time as these study sites shared a dietetic department.

*Supplementary Figure 1* Sequence of intervention roll-out in the stepped-wedge design.

## Supplementary File 2.

### *Inter- and Intra- Rater Reliability*

Inter-rater reliability (between the two coders) and intra-rater reliability (for each coder) for the study specific checklist was assessed using Cohen's kappa. For the BECCI and CTS-R competence and interpersonal effectiveness items, inter-rater and intra-rater reliability were assessed using two-way mixed, absolute agreement, single measure intraclass correlation coefficients (ICC). All indices of inter-rater and intra-rater reliability were interpreted according to published guidelines[1]: 0.01 ('poor' agreement); 0.02-0.2 ('slight' agreement); 0.21 to 0.40 ('fair' agreement); 0.41 to 0.60 ('moderate' agreement); 0.61 to 0.80 ('substantial' agreement); 0.81 to 1 ('almost perfect' agreement).

The level of inter-rater and intra-rater reliability achieved is summarised in Supplementary Table One. The majority of items within and between raters fell within the substantial to almost perfect range. Lower inter-rater reliability (slight to fair) was demonstrated by one study checklist item and both cognitive therapy scale items.

*Supplementary Table One.*

Summary of inter and intra-rater reliability for behaviour change outcomes

| Study Specific Checklist            |                                |                            |                              |                                          |                                      |                            | BECCI                            | Cognitive Therapy Scale    |                                |
|-------------------------------------|--------------------------------|----------------------------|------------------------------|------------------------------------------|--------------------------------------|----------------------------|----------------------------------|----------------------------|--------------------------------|
|                                     | Eating as<br>Integral to<br>RT | Reasons<br>for RT          | Written<br>Nutrition<br>Plan | Written<br>Nutrition<br>Plan<br>Reviewed | Validated<br>Nutrition<br>Assessment | Adequacy<br>of Intake      | Overall<br>Practitioner<br>Score | Competence                 | Interpersonal<br>Effectiveness |
| Inter-rater Reliability             |                                |                            |                              |                                          |                                      |                            |                                  |                            |                                |
| Cohen's<br>Kappa                    | .73<br>(Substantial)           | 1.0<br>(Almost<br>perfect) | .61<br>(Substantial)         | .81<br>(Almost<br>perfect)               | 0.84<br>(Almost<br>perfect)          | 0.15<br>(Slight)           | ---                              | ---                        | ---                            |
| ICC Single<br>Measures              | ---                            | ---                        | ---                          | ---                                      | ---                                  | ---                        | 0.56<br>(Moderate)               | 0.38<br>(Fair)             | 0.15<br>(Slight)               |
| Intra-rater Reliability (Rater One) |                                |                            |                              |                                          |                                      |                            |                                  |                            |                                |
| Cohen's<br>Kappa                    | .95<br>(Almost<br>perfect)     | 1.0<br>(Almost<br>perfect) | 1.0<br>(Almost<br>perfect)   | .93<br>(Almost<br>perfect)               | .97<br>(Almost<br>perfect)           | .79<br>(Substantial)       | ---                              | ---                        | ---                            |
| ICC Single<br>Measures              | ---                            | ---                        | ---                          | ---                                      | ---                                  | ---                        | .94<br>(Almost<br>perfect)       | .91<br>(Almost<br>perfect) | .95<br>(Almost<br>perfect)     |
| Intra-rater Reliability (Rater Two) |                                |                            |                              |                                          |                                      |                            |                                  |                            |                                |
| Cohen's<br>Kappa                    | 1.0<br>(Almost<br>perfect)     | 1.0<br>(Almost<br>perfect) | .96<br>(Almost<br>perfect)   | .95<br>(Almost<br>perfect)               | .93<br>(Almost<br>perfect)           | 1.0<br>(Almost<br>perfect) | ---                              | ---                        | ---                            |
| ICC Single<br>Measures              | ---                            | ---                        | ---                          | ---                                      | ---                                  | ---                        | .91<br>(Almost<br>perfect)       | .82<br>(Almost<br>perfect) | .87<br>(Almost<br>perfect)     |

1. Landis JR, Koch GG. The Measurement of Observer Agreement for Categorical Data. *Biometrics*. 1977;33(1):159-174.
